# Supplementary material for: Stability enhancement of InP quantum dot/poly(methyl methacrylate) nanocomposites for light-emitting diode applications by grafting thermoresponsive poly(N-isopropylacrylamide)
Source: Royal Society of Chemistry journal article supplement (doi:10.1039/d1tc03252f), 2021-01-01
Supplement: d1tc03252f1.pdf [file d1tc03252f1.pdf]

Supplementary Information

**Stability enhancement of InP quantum dot/poly(methyl methacrylate)  
nanocomposite for light-emitting diode applications by grafting  
thermoresponsive poly(N-isopropylacrylamide)**

Joon Hee Jo, Seung Jun Lee, Ho Seok Heo and Kangtaek Lee\*

Department of Chemical and Biomolecular Engineering, Yonsei University 50 Yonsei-ro,  
Seodaemun-gu, Seoul 03722, Republic of Korea

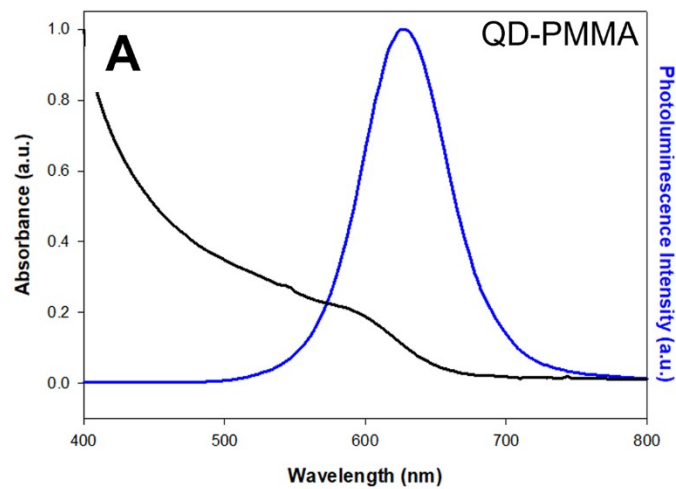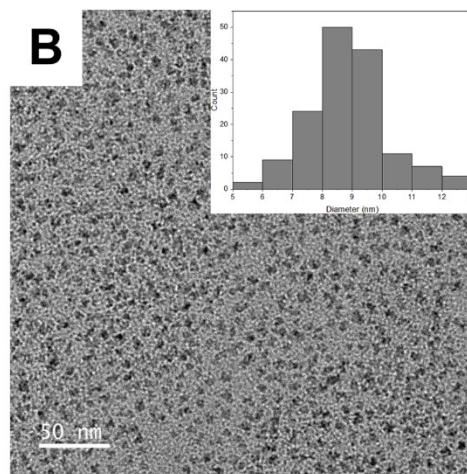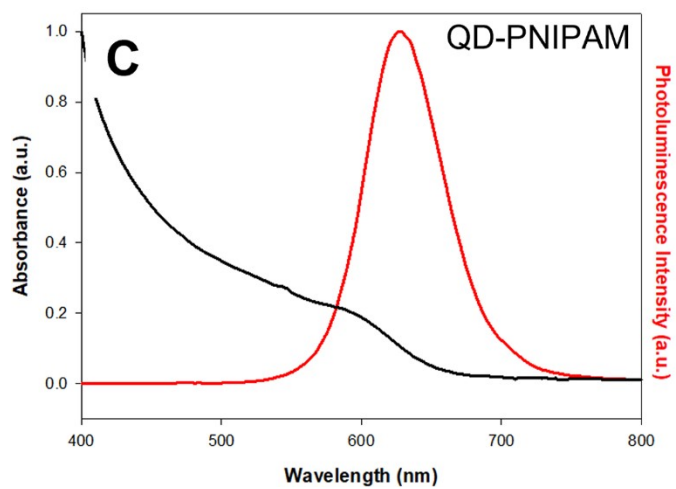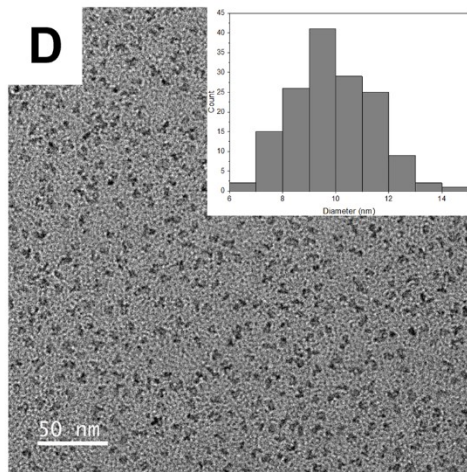

Fig. S1. (A, C) Absorption and emission spectra and (B, D) TEM image of polymer-grafted QDs.

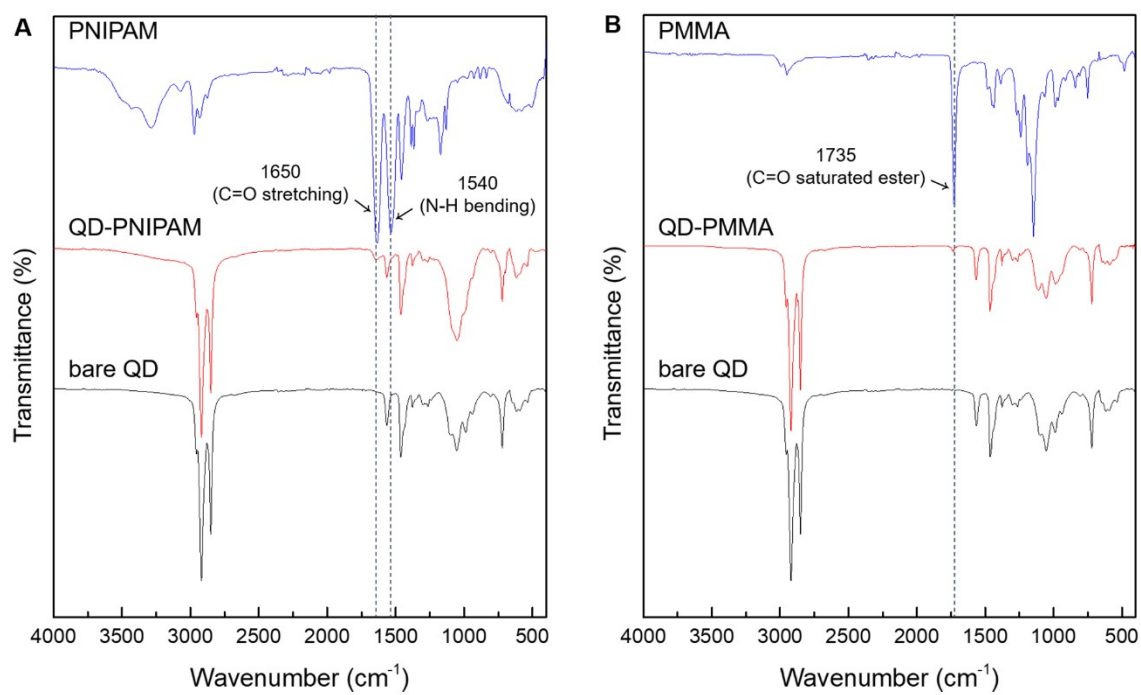

Fig. S2. FTIR spectra of bare QDs, (A) QD-PNIPAM, and (B) QD-PMMA.

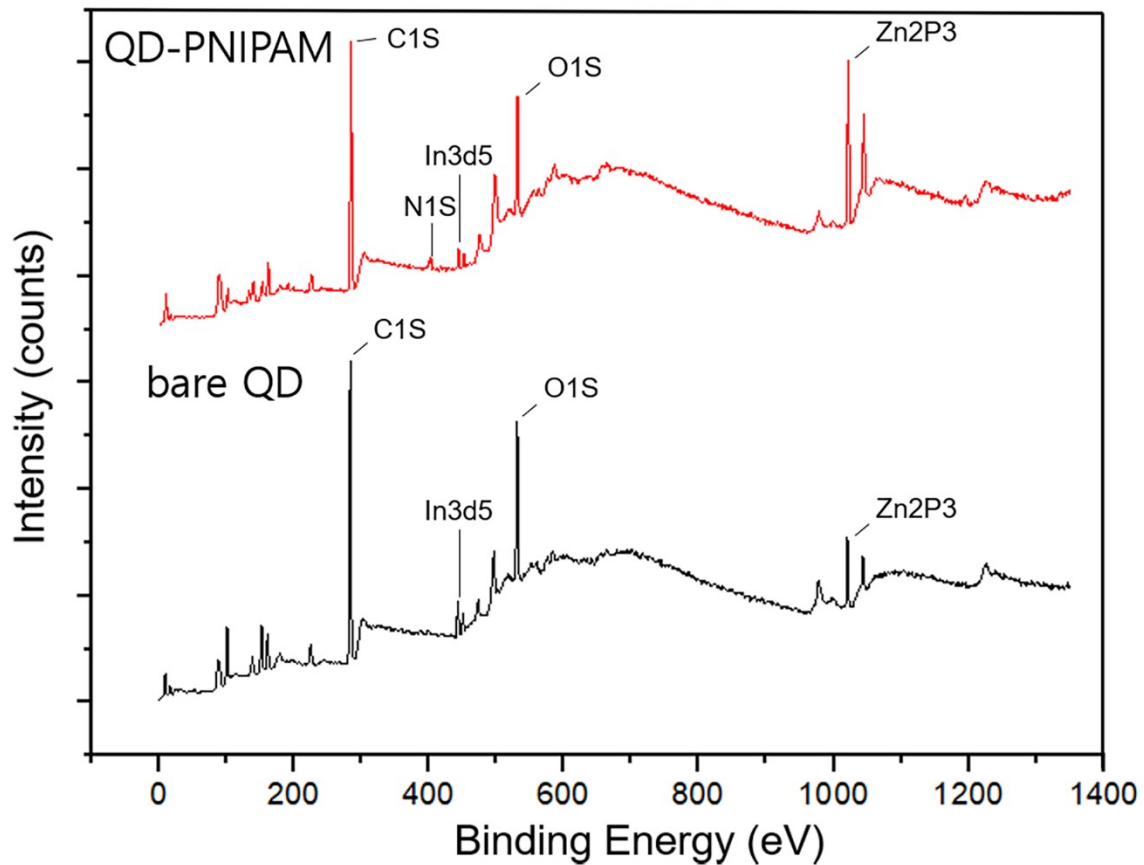

Fig. S3. XPS survey spectrum of QD-PNIPAM.

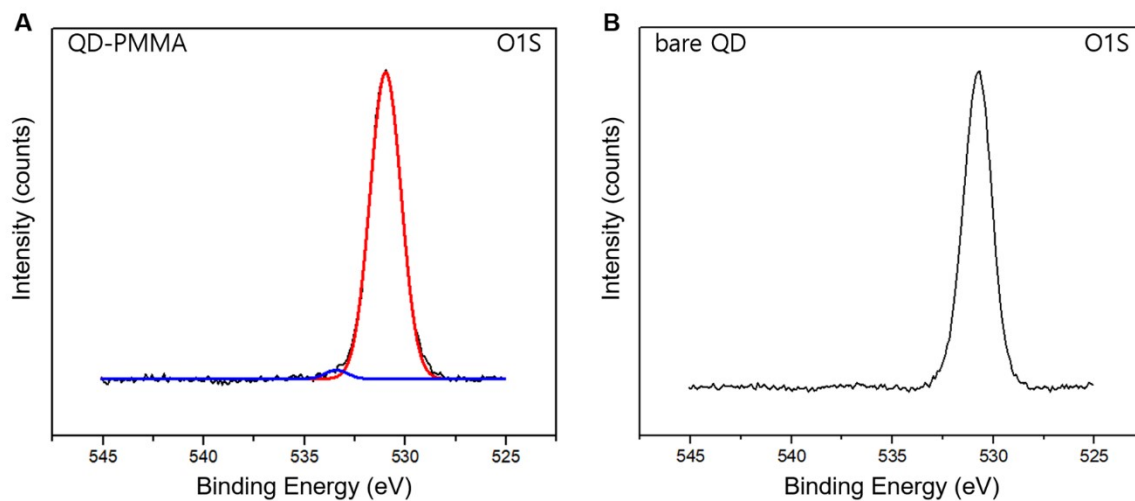

Fig. S4. XPS spectra of O1S photoelectron peaks of (A) QD-PMMA and (B) bare QDs.
